# Supplementary material for: Challenges in conducting genome-wide association studies in highly admixed multi-ethnic populations: the Generation R Study
Source: PubMed Central journal article supplement (PMC4385148; doi:10.1007/s10654-015-9998-4), 2015-03-12
Supplement: 10654_2015_9998_MOESM2_ESM.pdf [file 10654_2015_9998_MOESM2_ESM.pdf]

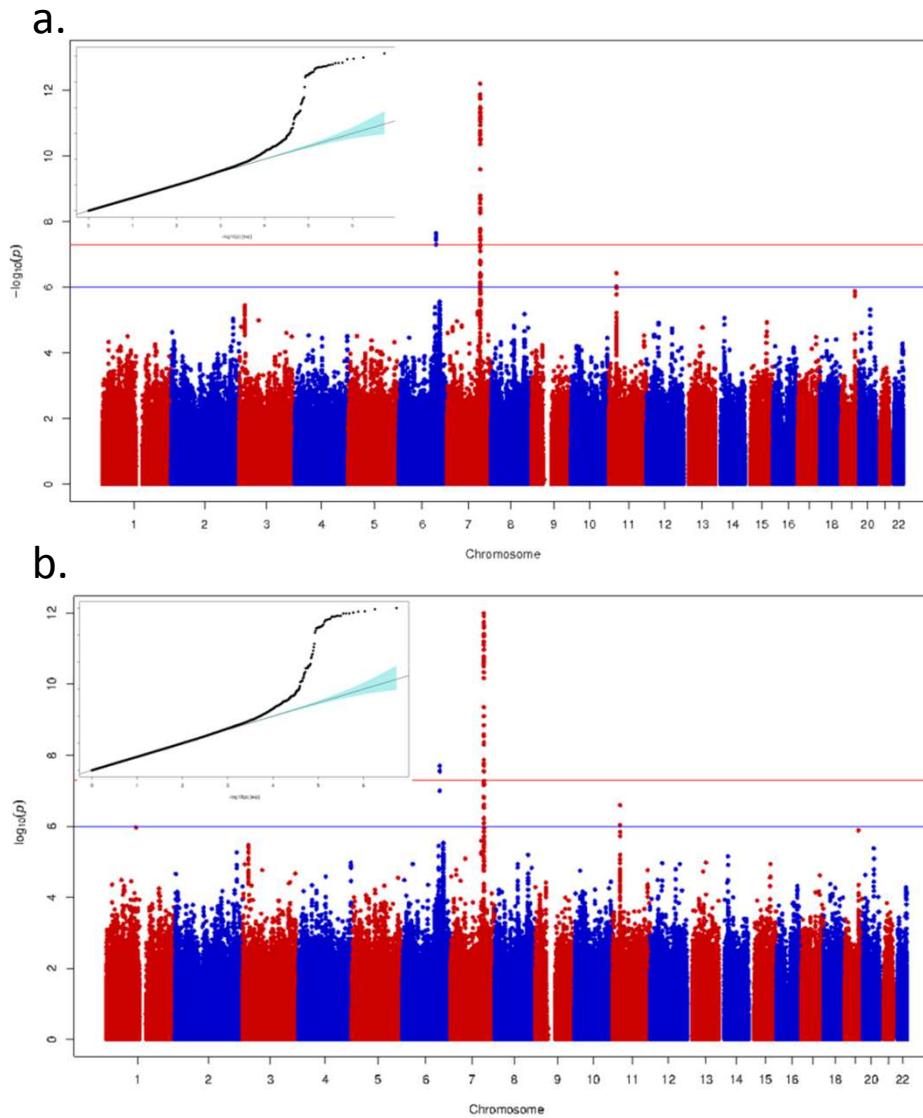

**Online Resource 10. GWAS of skull BMD in the Generation R cohort** Q-Q plot by MAF and Manhattan Plot for the association analysis based on adjustment for 20 genomic components. **b.** Q-Q plot by MAF and Manhattan Plot for the association analysis based on Linear Mixed Models (EMMAX).
