# Supplementary material for: Challenges in conducting genome-wide association studies in highly admixed multi-ethnic populations: the Generation R Study
Source: PubMed Central journal article supplement (PMC4385148; doi:10.1007/s10654-015-9998-4), 2015-03-12
Supplement: 10654_2015_9998_MOESM3_ESM.pdf [file 10654_2015_9998_MOESM3_ESM.pdf]

**Online Resource 11. Skull BMD association results comparison.** Analysis summary for the top hit SNPs associated with skull BMD in the Generation R Study, both by mixed models (EMMAX) and adjustment by genomic components.

| SNP        | CHR | BP       | EA | OA | EAF   | BETA_20PCs | P_20PCs  | BETA_EMMAX | P_EMMAX  | n_total |
|------------|-----|----------|----|----|-------|------------|----------|------------|----------|---------|
| rs13223036 | 7   | 1.21E+08 | T  | G  | 0.655 | 0.167      | 6.21E-13 | 0.164      | 1.02E-12 | 4086    |
| rs1917113  | 7   | 1.21E+08 | G  | A  | 0.661 | 0.164      | 1.29E-12 | 0.163      | 1.23E-12 | 4086    |
| rs6954757  | 7   | 1.21E+08 | G  | A  | 0.661 | 0.163      | 1.59E-12 | 0.162      | 1.77E-12 | 4086    |
| rs6466769  | 7   | 1.21E+08 | A  | G  | 0.661 | 0.163      | 1.76E-12 | 0.162      | 1.86E-12 | 4086    |
| rs10500083 | 7   | 1.21E+08 | T  | C  | 0.649 | 0.164      | 3.25E-12 | 0.163      | 2.23E-12 | 4086    |
| rs2272196  | 7   | 1.21E+08 | G  | A  | 0.649 | 0.164      | 3.41E-12 | 0.163      | 2.56E-12 | 4086    |
| rs7795692  | 7   | 1.21E+08 | A  | G  | 0.649 | 0.164      | 3.54E-12 | 0.163      | 2.56E-12 | 4086    |
| rs10480747 | 7   | 1.21E+08 | A  | C  | 0.659 | 0.163      | 4.45E-12 | 0.163      | 2.57E-12 | 4086    |
| rs11771945 | 7   | 1.21E+08 | C  | G  | 0.656 | 0.162      | 6.15E-12 | 0.162      | 3.81E-12 | 4086    |
| rs11765163 | 7   | 1.21E+08 | A  | T  | 0.656 | 0.162      | 6.20E-12 | 0.162      | 3.81E-12 | 4086    |
