# Supplementary material for: Challenges in conducting genome-wide association studies in highly admixed multi-ethnic populations: the Generation R Study
Source: PubMed Central journal article supplement (PMC4385148; doi:10.1007/s10654-015-9998-4), 2015-03-12
Supplement: 10654_2015_9998_MOESM9_ESM.pdf [file 10654_2015_9998_MOESM9_ESM.pdf]

**MACH Rsq patterns by chromosome.** The recommended threshold for Good-quality SNPs to be used for downstream analysis is  $Rsq \geq 0.3$ .

| MACH R2             | CHROMOSOME    |               |               |               |               |               |               |               |               |               |               |               |               |               |               |               |               |               |               |               |               |               | TOTAL           |
|---------------------|---------------|---------------|---------------|---------------|---------------|---------------|---------------|---------------|---------------|---------------|---------------|---------------|---------------|---------------|---------------|---------------|---------------|---------------|---------------|---------------|---------------|---------------|-----------------|
|                     | 1             | 2             | 3             | 4             | 5             | 6             | 7             | 8             | 9             | 10            | 11            | 12            | 13            | 14            | 15            | 16            | 17            | 18            | 19            | 20            | 21            | 22            |                 |
| <i>HapMap</i>       |               |               |               |               |               |               |               |               |               |               |               |               |               |               |               |               |               |               |               |               |               |               |                 |
| <b>Bad quality</b>  | 8200          | 6328          | 4447          | 5069          | 4890          | 4986          | 4833          | 3579          | 4258          | 4613          | 4096          | 5025          | 3332          | 2843          | 3366          | 3853          | 2961          | 3025          | 2665          | 2887          | 1423          | 1946          | <b>88625</b>    |
| <b>Good quality</b> | 228667        | 261026        | 197504        | 186055        | 192896        | 209995        | 162037        | 169281        | 139218        | 162141        | 151521        | 141297        | 121948        | 96742         | 82861         | 82493         | 66898         | 90374         | 40657         | 73289         | 37845         | 37959         | <b>2932704</b>  |
| <b>%R2&lt;0.3</b>   | 3.46%         | 2.37%         | 2.20%         | 2.65%         | 2.47%         | 2.32%         | 2.90%         | 2.07%         | 2.97%         | 2.77%         | 2.63%         | 3.43%         | 2.66%         | 2.86%         | 3.90%         | 4.46%         | 4.24%         | 3.24%         | 6.15%         | 3.79%         | 3.62%         | 4.88%         | <b>2.93%</b>    |
| <i>1KG</i>          |               |               |               |               |               |               |               |               |               |               |               |               |               |               |               |               |               |               |               |               |               |               |                 |
| <b>Bad quality</b>  | 657829        | 685548        | 558906        | 597384        | 504643        | 505472        | 505524        | 436387        | 339923        | 370793        | 402498        | 386277        | 268817        | 263920        | 264367        | 305205        | 292029        | 233707        | 259447        | 188387        | 116460        | 122388        | <b>8265911</b>  |
| <b>Good quality</b> | 1697611       | 1898088       | 1609139       | 1571480       | 1485993       | 1420742       | 1247820       | 1279072       | 958421        | 1115971       | 1083127       | 1053925       | 817268        | 725442        | 619541        | 637635        | 526134        | 621840        | 392776        | 479743        | 293173        | 271886        | <b>21806827</b> |
| <b>%R2&lt;0.3</b>   | <b>27.93%</b> | <b>26.53%</b> | <b>25.78%</b> | <b>27.54%</b> | <b>25.35%</b> | <b>26.24%</b> | <b>28.83%</b> | <b>25.44%</b> | <b>26.18%</b> | <b>24.94%</b> | <b>27.09%</b> | <b>26.82%</b> | <b>24.75%</b> | <b>26.68%</b> | <b>29.91%</b> | <b>32.37%</b> | <b>35.69%</b> | <b>27.32%</b> | <b>39.78%</b> | <b>28.20%</b> | <b>28.43%</b> | <b>31.04%</b> | <b>27.49%</b>   |
