# Supplementary material for: Challenges in conducting genome-wide association studies in highly admixed multi-ethnic populations: the Generation R Study
Source: PubMed Central journal article supplement (PMC4385148; doi:10.1007/s10654-015-9998-4), 2015-03-12
Supplement: 10654_2015_9998_MOESM10_ESM.pdf [file 10654_2015_9998_MOESM10_ESM.pdf]

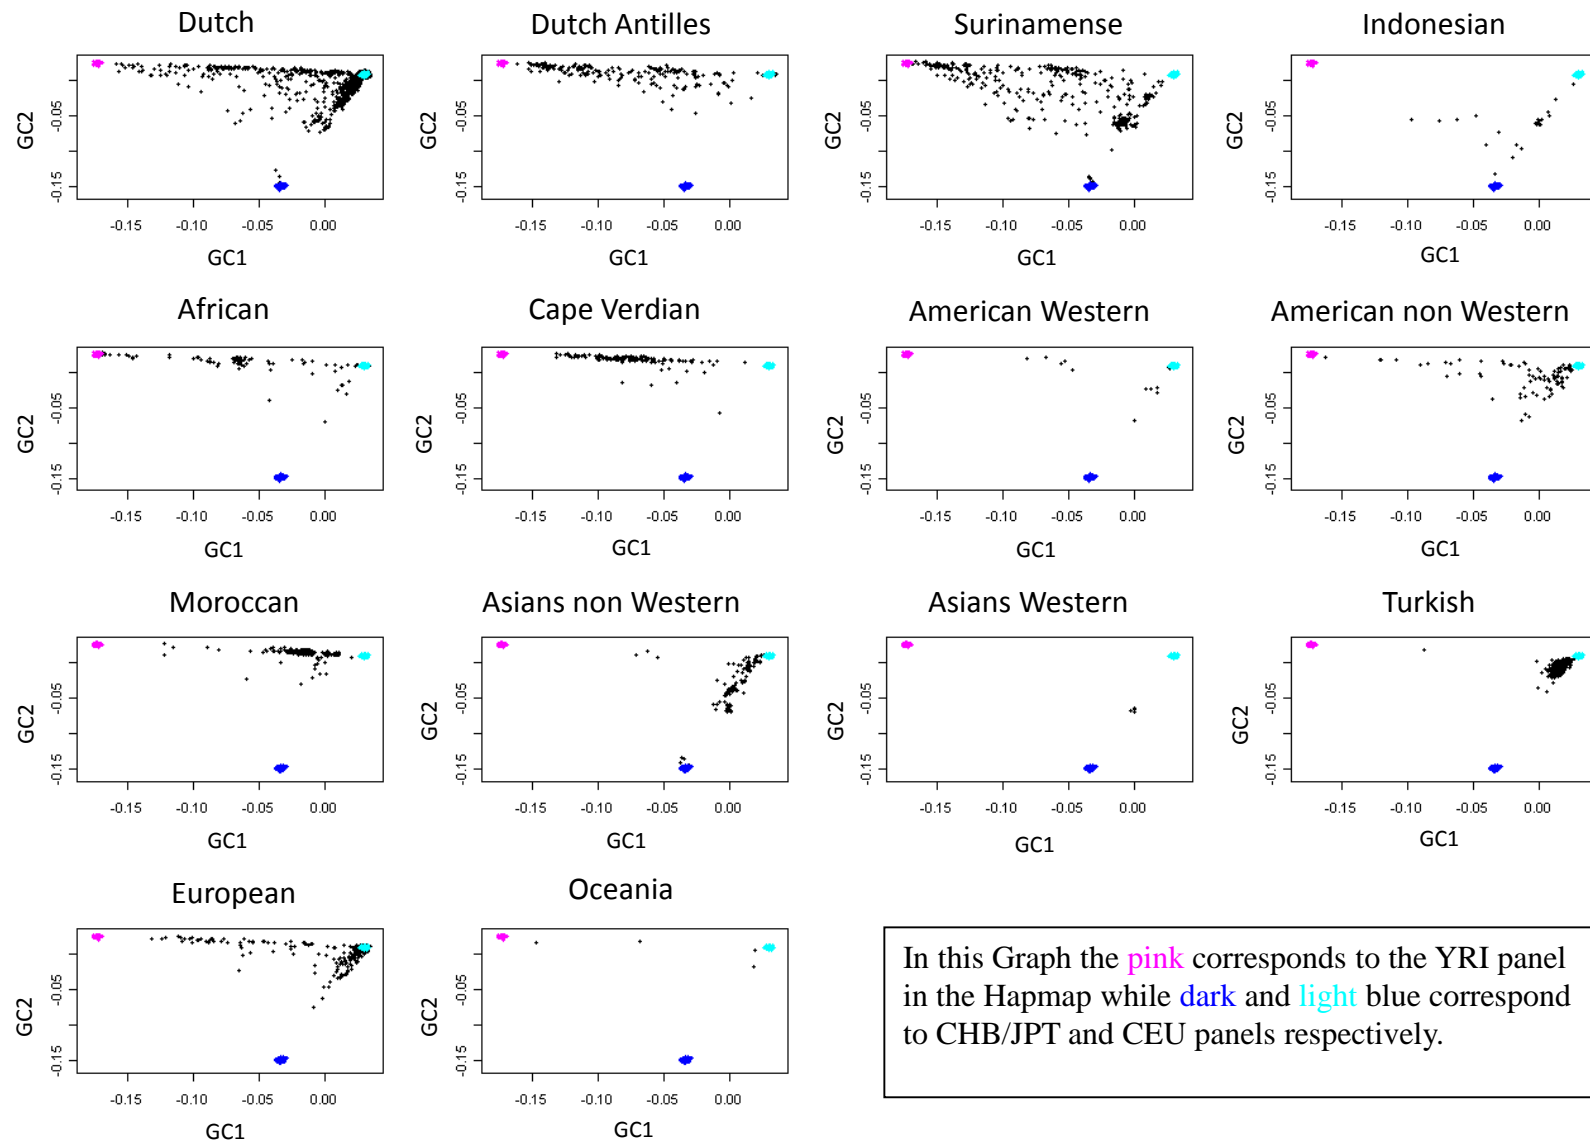

In this Graph the pink corresponds to the YRI panel in the Hapmap while dark and light blue correspond to CHB/JPT and CEU panels respectively.

**Online Resource 7. Ethnic sub-structure of the Generation R Study.** Two-dimensional plots of the first and second dimensions from a MDS performed with an Identical By State (IBS) distance matrix computed between pairs of individuals, denoted as GC. Each panel represents a different ethnicity as calculated by the classification of Statistics Netherlands
