# Supplementary material for: Challenges in conducting genome-wide association studies in highly admixed multi-ethnic populations: the Generation R Study
Source: PubMed Central journal article supplement (PMC4385148; doi:10.1007/s10654-015-9998-4), 2015-03-12
Supplement: 10654_2015_9998_MOESM11_ESM.pdf [file 10654_2015_9998_MOESM11_ESM.pdf]

**Online Resource 8. Red hair association results comparison.** Analysis GIF and p-values for the top hit SNPs associated with red hair color in the Generation R Study, both by mixed models (EMMAX) and adjustment by genomic components.

|                  | <u>EMMAX</u> | <u>4 PCs</u> |
|------------------|--------------|--------------|
| GIF              | 0.994        | 0.999        |
| Top-Hits P-value |              |              |
| rs258322         | 7.53E-17     | 4.03E-17     |
| rs8049897        | 1.38E-10     | 1.22E-10     |
| rs16471          | 1.58E-09     | 1.90E-09     |
| rs4238833        | 5.71E-08     | 4.12E-08     |
| rs4785763        | 1.01E-08     | 8.56E-08     |
| rs7188458        | 2.81E-08     | 5.80E-07     |
