# Supplementary material for: Challenges in conducting genome-wide association studies in highly admixed multi-ethnic populations: the Generation R Study
Source: Springer Nature journal article supplement (doi:10.1007/s10654-015-9998-4), 2015-03-11
Supplement: MOESM4 [file 8885736]

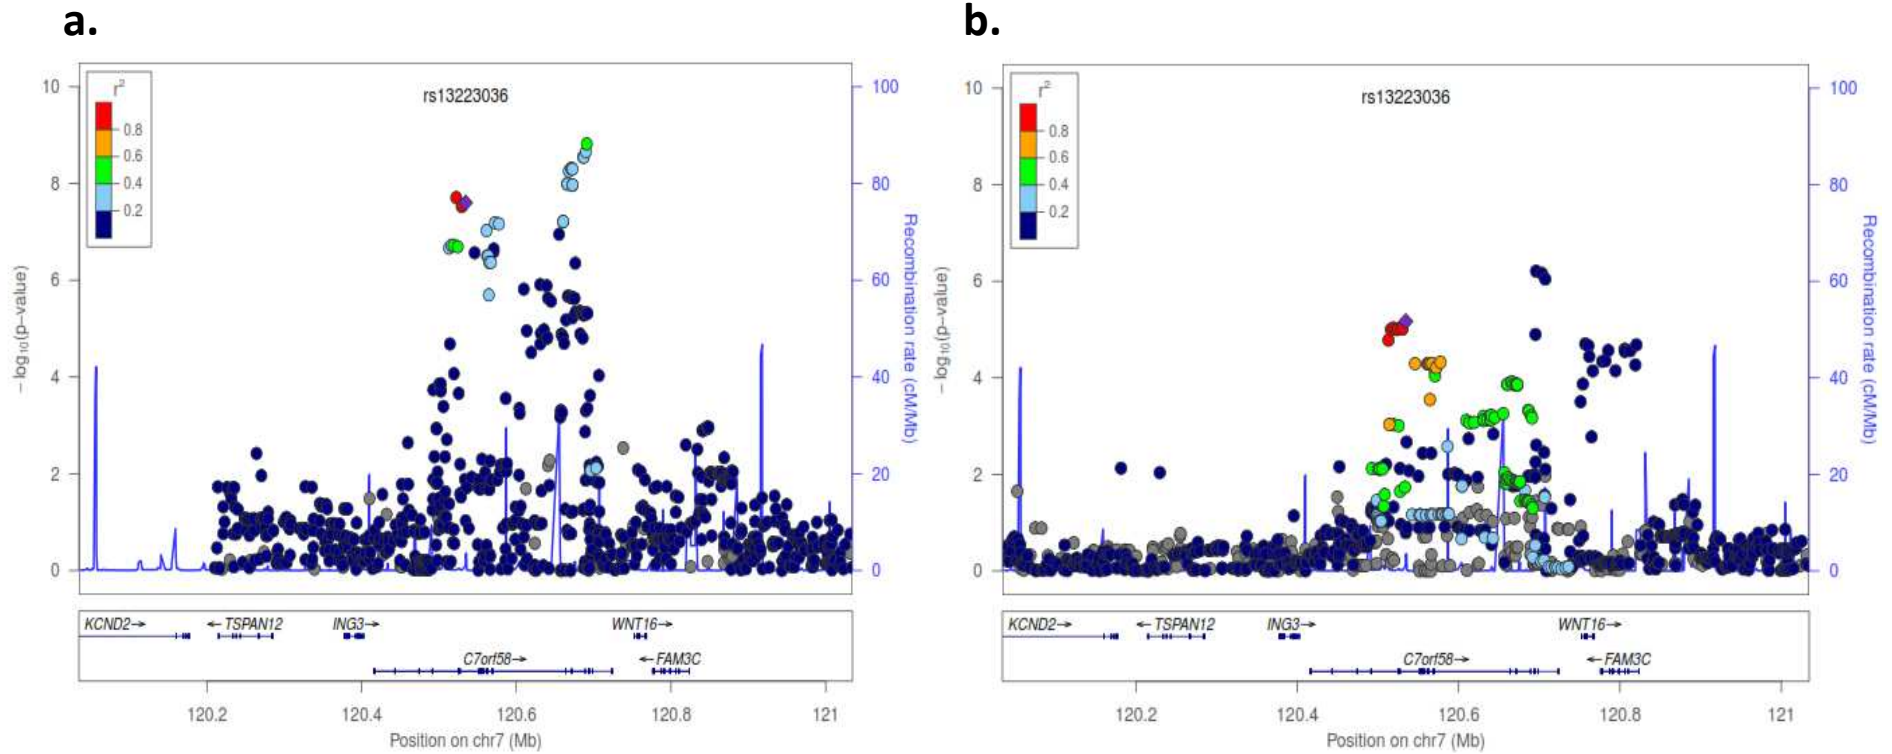

**Online Resource 12. Regional Association Plot for skull BMD in the *WNT16/CPED1* loci.** GWAS using genomic components approach. SNP rs13223036 is denoted by a diamond. Different colors indicate varying degrees of pair-wise linkage disequilibrium between the top SNP and all other genotyped SNPs. **a.** Non-European children (n=1,909). Genetic coordinates are per Hap-Map ref. 22 b.36-YRI. **b.** European children (n=1,909). Genetic coordinates are per Hap-Map ref. 22 b.36-CEU.
