# Supplementary material for: Challenges in conducting genome-wide association studies in highly admixed multi-ethnic populations: the Generation R Study
Source: Springer Nature journal article supplement (doi:10.1007/s10654-015-9998-4), 2015-03-11
Supplement: MOESM5 [file 8885736]

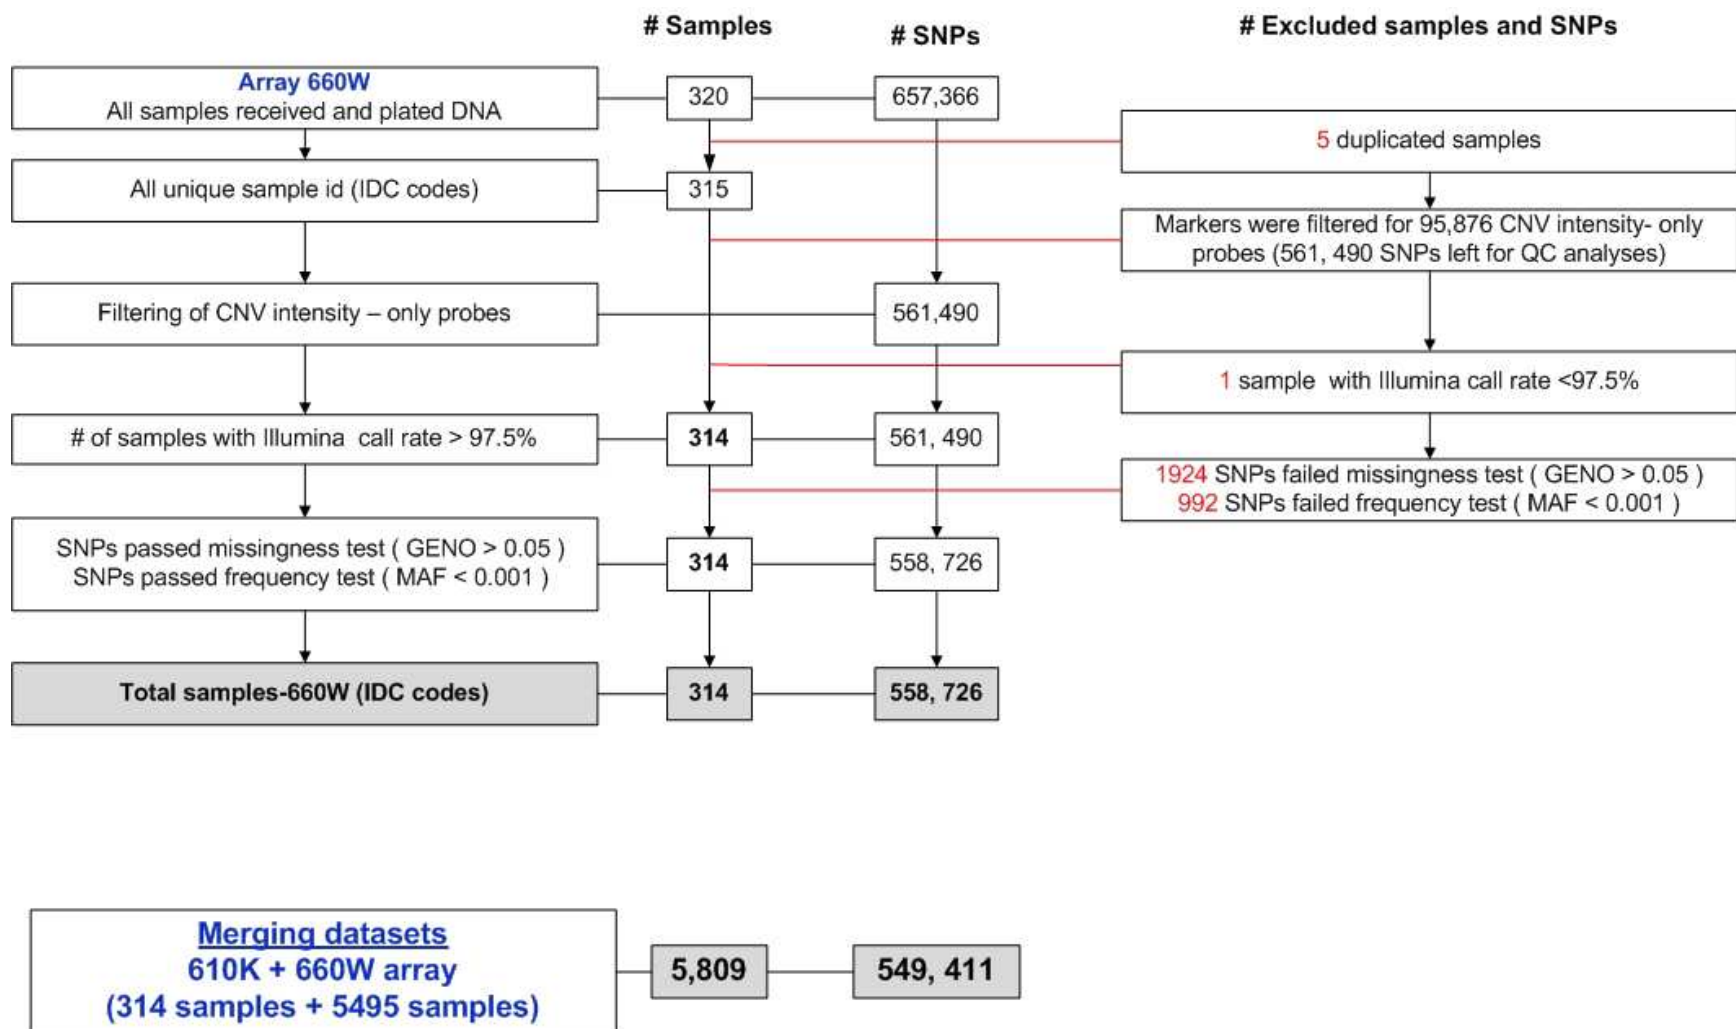

**Online Resource 2. Flowchart overview of the Generation R-2 set and merging of the two datasets.** Quality control of samples collected at 6 years from peripheral blood (Generation R-2) and processed in platform Illumina HapMap 660-W and merging of the projects. Red font denotes exclusion of either SNPs or samples from the dataset in the different QC steps.
