# Supplementary material for: Challenges in conducting genome-wide association studies in highly admixed multi-ethnic populations: the Generation R Study
Source: Springer Nature journal article supplement (doi:10.1007/s10654-015-9998-4), 2015-03-11
Supplement: MOESM6 [file 8885736]

**Ethnicity as defined by the Generation R Study.** Ethnicity of the children part of the Generation R birth cohort.

| <b>Ethnicity</b>    | <b>Frequency</b> | <b>Percent</b> | <b>Cumulative Percent</b> |
|---------------------|------------------|----------------|---------------------------|
| Dutch               | 4897             | 50.2           | <b>53.8</b>               |
| Indonesian          | 41               | 0.4            | <b>54.3</b>               |
| Cape Verdian        | 252              | 2.6            | <b>57.1</b>               |
| Moroccan            | 626              | 6.4            | <b>64</b>                 |
| Dutch Antilles      | 358              | 3.7            | <b>67.9</b>               |
| Surinamese          | 707              | 7.3            | <b>75.7</b>               |
| Turkish             | 722              | 7.4            | <b>83.6</b>               |
| African             | 249              | 2.6            | <b>86.3</b>               |
| American western    | 61               | 0.6            | <b>87</b>                 |
| America non western | 157              | 1.6            | <b>88.7</b>               |
| Asia western        | 9                | 0.1            | <b>88.8</b>               |
| Asia non western    | 280              | 2.9            | <b>91.9</b>               |
| European            | 719              | 7.4            | <b>99.8</b>               |
| Oceania             | 16               | 0.2            | <b>100</b>                |
| Total               | 9094             | 93.3           |                           |
| Missing             | 655              | 6.7            |                           |
|                     | 9749             | 100            |                           |

American western: United States of America and Canada

American Non-Western: Other countries in the American Continent except United States of America and Canada

Asian Western: Japan

Asian Non-Western: Other countries in the Asian continent except for Japan and Indonesia
