# Supplementary material for: Challenges in conducting genome-wide association studies in highly admixed multi-ethnic populations: the Generation R Study
Source: Springer Nature journal article supplement (doi:10.1007/s10654-015-9998-4), 2015-03-11
Supplement: MOESM7 [file 8885736]

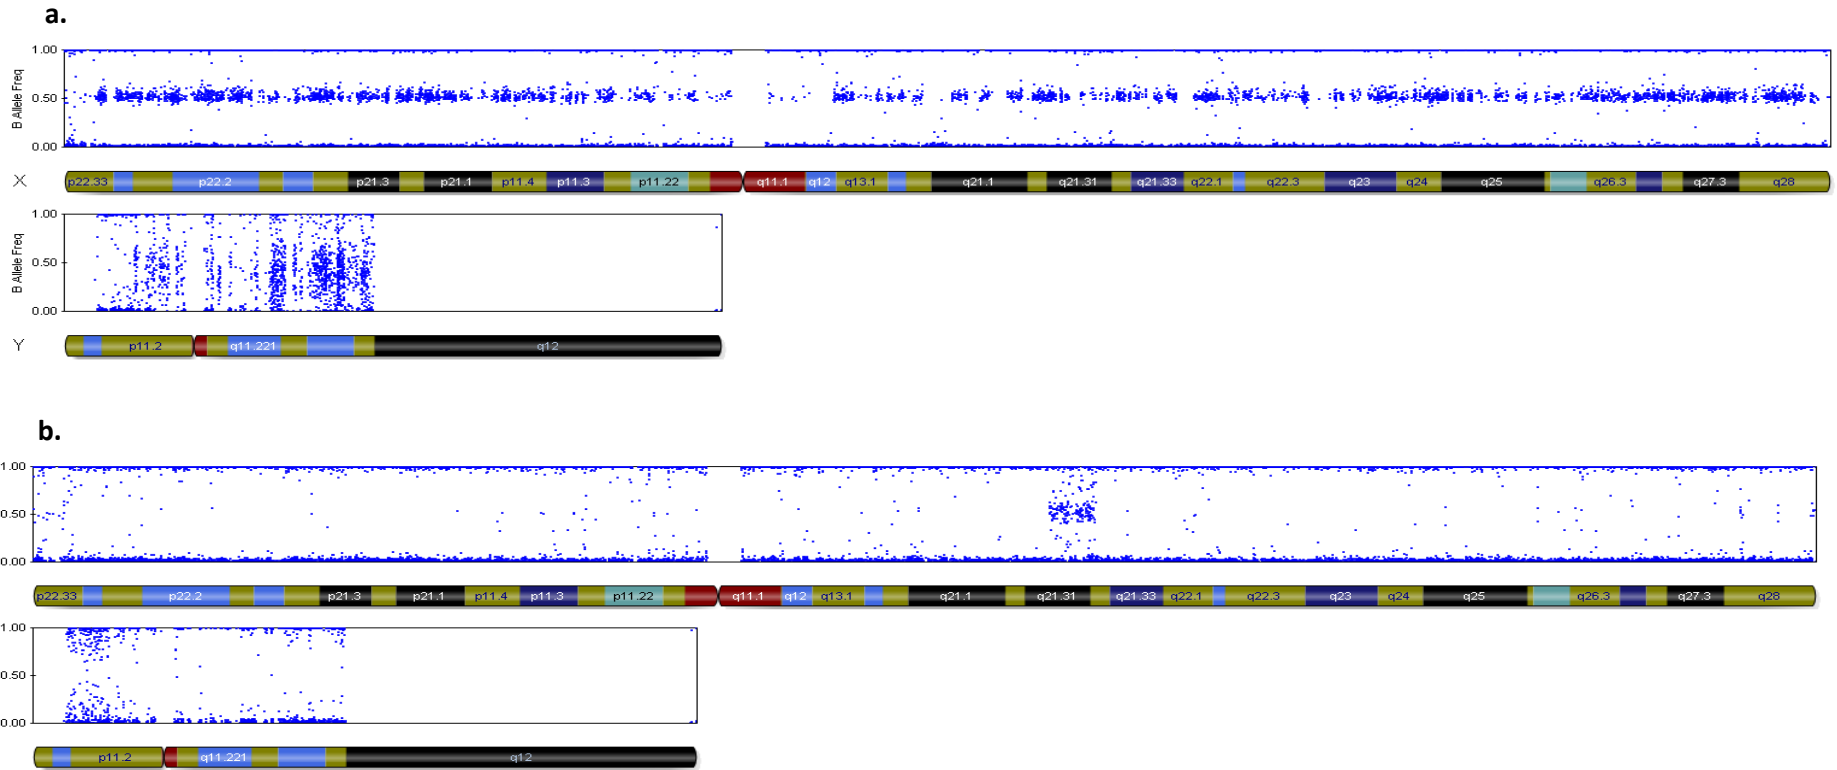

**Heterozygosity checks on chromosomes X and Y.** The heterozygosity output from Genome studio allows the identification of both males and females. **a.** A normal female: homozygous and heterozygous X SNPs. The disperse patten for Y-chromosome markers are seen in all females. **b.** A normal male: homozygous X SNPs and homozygous Y SNPs (few heterozygous SNPs).
