# Supplementary material for: Challenges in conducting genome-wide association studies in highly admixed multi-ethnic populations: the Generation R Study
Source: Springer Nature journal article supplement (doi:10.1007/s10654-015-9998-4), 2015-03-11
Supplement: MOESM8 [file 8885736]

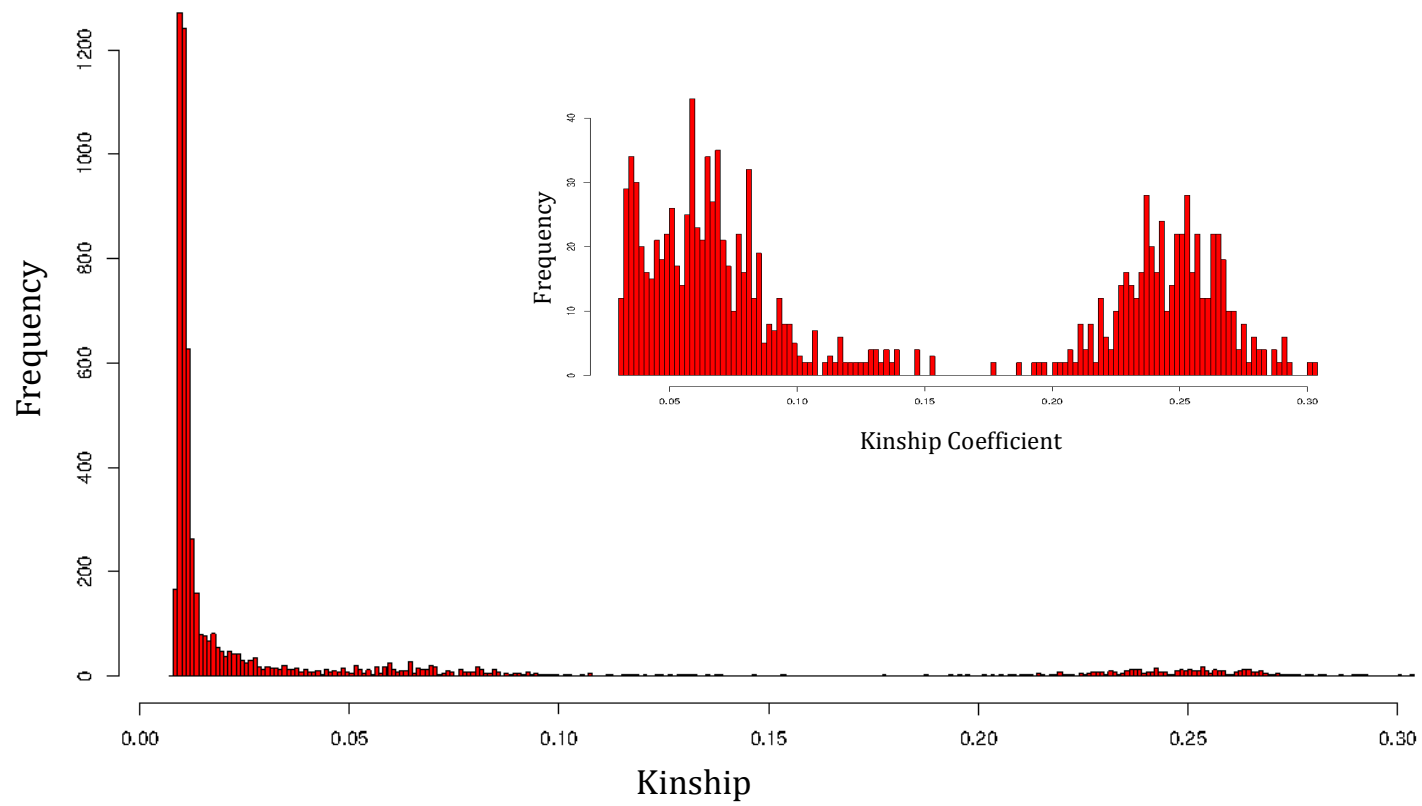

Histogram showing the distribution of pairwise kinship coefficients (smaller picture is zoomed into the part of the graph in which the coefficient is greater than 0.03125,  $n=1593$ ). The peak over 0.25 represents siblings. The peak close to 0.25 second degree relatives and at 0.0625 third degree relatives.
